## Endocardial pacing is not haemodynamically superior to trans-coronary sinus epicardial pacing in cardiac resynchronization therapy: the Endo-Epi CRT study

Okafor O.<sup>1</sup>; Zegard A.<sup>1</sup>; Stegemann B.<sup>1</sup>; Arif S.<sup>2</sup>; De Bono J.<sup>2</sup>; Marshall H.<sup>2</sup>; Leyva F.<sup>1</sup>

<sup>1</sup>Aston University, Aston Medical Research Institute, Birmingham, United Kingdom of Great Britain & Northern Ireland

<sup>2</sup>Queen Elizabeth Hospital Birmingham, Department of Cardiology, Birmingham, United Kingdom of Great Britain & Northern Ireland

**Funding Acknowledgements:** Type of funding sources: Private grant(s) and/or Sponsorship. Main funding source(s): Medtronic

**Background:** Cardiac resynchronization therapy (CRT) conventionally involves trans-coronary sinus, epicardial left ventricular (LV) pacing. Some studies have suggested that endocardial LV pacing may be superior to epicardial LV pacing.

**Objectives:** To compare the acute haemodynamic effects of CRT when delivered from endocardial (Endo-CRT) and epicardial LV stimulation sites (Epi-CRT).

**Methods and results:** Sixteen CRT recipients (aged  $70.4 \pm 10.1$  years [mean  $\pm$  SD], 62.5% male, QRS:  $156.5 \pm 16.1$  ms, LBBB in 13 [81.3%]) in sinus rhythm underwent intra-procedural measurements of the rate of rise of LV pressure (dP/dt<sub>max</sub>) during Endo- and Epi-CRT (RADI pressure wire). Epi-CRT was delivered in basal, mid and apical positions. The Endo-CRT pacing site was chosen using iterative, bi-plane fluoroscopic views, to target the same position as the Epi-CRT site on the endocardium (see Figure A). Compared to AAI pacing (10 beats per minute above intrinsic rate), both Endo-CRT and Epi-CRT led to an increase in LV dP/dt<sub>max</sub> ( $6.52 \pm 8.90\%$  and  $6.15 \pm 7.97\%$  respectively, both  $p < 0.001$ ). There were no significant differences in the change in LV dP/dt<sub>max</sub> ( $\Delta$ LV dP/dt<sub>max</sub>) between Endo-CRT and Epi-CRT at basal ( $p = 0.54$ ), mid ( $p = 0.78$ ) or apical LV stimulation sites ( $p = 0.12$ ) [Figure B].

**Conclusions:** Endo-CRT is not haemodynamically superior to Epi-CRT.

Abstract Figure.

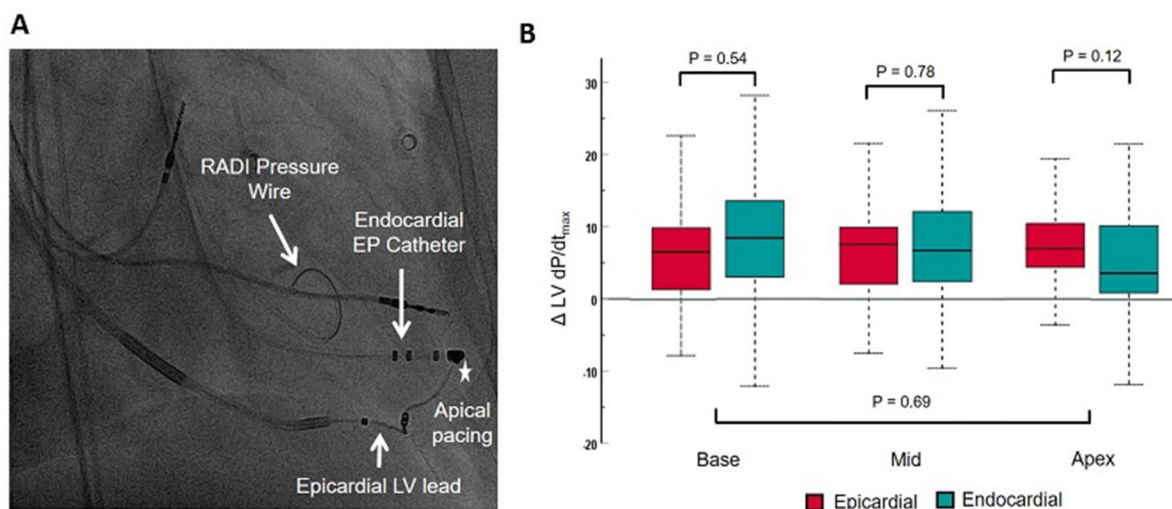

Source: http://academic.oup.com/europace/article-pdf/23/Supplement_3/euab116.444/38132011/euab116.444.pdf
